# Supplementary material for: Demystifying Ear Anatomy Through a 3D Virtual Simulation Game: An Exploratory Study Among First-Year MBBS Students
Source: Research Square preprint supplement (doi:10.21203/rs.3.rs-8387254/v1), 2026-01-08
Supplement: Supplementary file 1 [file 2b8df94f381b38fa6cccfad5.docx]

**Table 1. Baseline Demographic and Academic Characteristics of First-Year MBBS Students by Study Groupᵃ (N = 50)**

| **Characteristic** | **Lecture only (Group 1, n=25)** | **Lecture + Game (Group 2, n=25)** | **Total (N=50)** | ***p*-valueᵇ** |
| --- | --- | --- | --- | --- |
| **Age (years)** |  |  |  |  |
| Mean ± SD | 18.76 ± 0.83 | 18.64 ± 0.81 | 18.70 ± 0.81 | 0.61 |
| Range | 18–20 | 18–20 | 18–20 |  |
| Cohen’s *d*ᶜ | 0.15 |  |  |  |
| **Gender, n (%)** |  |  |  | 0.78ᵈ |
| Male | 13 (52.0) | 11 (44.0) | 24 (48.0) |  |
| Female | 12 (48.0) | 14 (56.0) | 26 (52.0) |  |
| Other | 0 (0.0) | 0 (0.0) | 0 (0.0) |  |
| **MBBS year, n (%)** |  |  |  | —ᵉ |
| First year | 25 (100.0) | 25 (100.0) | 50 (100.0) |  |
| **Batch / Admission year, n (%)** |  |  |  | —ᵉ |
| 2024 | 25 (100.0) | 25 (100.0) | 50 (100.0) |  |
| **Previous anatomy percentage (% )** |  |  |  |  |
| Mean ± SD | 65.10 ± 7.08 | 66.32 ± 6.51 | 65.71 ± 6.76 | 0.53 |
| Range | 49.0–80.7 | 54.0–84.3 | 49.0–84.3 |  |
| Cohen’s *d*ᶜ | −0.18 |  |  |  |
| **Overall academic percentage (% )** |  |  |  |  |
| Mean ± SD | 65.42 ± 8.01 | 67.32 ± 7.10 | 66.37 ± 7.55 | 0.38 |
| Range | 51.1–84.0 | 51.6–84.2 | 51.1–84.2 |  |
| Cohen’s *d*ᶜ | −0.25 |  |  |  |

*ᵃ Continuous variables are presented as****mean ± standard deviation (SD)****and range; categorical variables are presented as****number (percentage)****. ᵇ p-values for continuous variables (age, previous anatomy %, overall %) are from****Welch’s independent samples t-tests****comparing Group 1 vs Group 2. ᶜ Cohen’s d calculated using pooled SD; values around 0.2 are considered small, 0.5 medium, 0.8 large. Here, all effects are in the****negligible-to-small****range, indicating minimal baseline differences. ᵈ p-value for gender from****χ² test of independence****on a 2×2 table (Male vs Female; there were no “Other” responses). ᵉ All participants were****first-year MBBS students from the 2024 batch****by design; no between-group comparison was performed.*

**Table 2. Baseline Technology Use, Gaming Habits, Spatial Ability, and Attitudes Toward Anatomy by Study Groupᵃ (N = 50)**

| **Measure** | **Lecture only (Group 1, n=25)** | **Lecture + Game (Group 2, n=25)** | ***p*-valueᵇ** |
| --- | --- | --- | --- |
| **Tech comfort using smartphone/computerᶜ** |  |  |  |
| Mean ± SD (range) | 4.24 ± 0.60 (3–5) | 4.04 ± 0.68 (3–5) | 0.27 |
| Cohen’s *d*ᵈ | 0.31 |  |  |
| **Gaming frequencyᵉ, n (%)** |  |  | 0.94ᶠ |
| 1 – Never | 5 (20.0) | 4 (16.0) |  |
| 2 – Rarely (<1×/week) | 8 (32.0) | 9 (36.0) |  |
| 3 – Sometimes (1–2×/week) | 9 (36.0) | 10 (40.0) |  |
| 4 – Often (3–4×/week) | 3 (12.0) | 2 (8.0) |  |
| 5 – Very often (almost daily) | 0 (0.0) | 0 (0.0) |  |
| **Prior 3D/VR anatomy exposure, n (%)**ᵍ |  |  | 0.39ᶠ |
| 1 – No, never | 21 (84.0) | 17 (68.0) |  |
| 2 – Yes, once or twice | 2 (8.0) | 3 (12.0) |  |
| 3 – Yes, several times | 2 (8.0) | 5 (20.0) |  |
| **Spatial ability score (0–12)**ʰ |  |  |  |
| Mean ± SD (range) | 7.28 ± 1.40 (5–10) | 7.04 ± 2.68 (2–12) | 0.69 |
| Cohen’s *d*ᵈ | 0.11 |  |  |
| **Baseline attitudes to anatomyⁱ** |  |  |  |
| Interest in learning anatomy |  |  |  |
| Mean ± SD (1–5) | 4.08 ± 0.49 | 4.00 ± 0.71 | 0.65 |
| Cohen’s *d*ᵈ | 0.13 |  |  |
| Preference for traditional methods |  |  |  |
| Mean ± SD (1–5) | 3.80 ± 0.71 | 3.92 ± 0.76 | 0.57 |
| Cohen’s *d*ᵈ | −0.16 |  |  |
| Perceived difficulty of ear anatomy |  |  |  |
| Mean ± SD (1–5) | 3.92 ± 0.64 | 3.72 ± 0.61 | 0.27 |
| Cohen’s *d*ᵈ | 0.32 |  |  |

*ᵃ Continuous and Likert-type variables are summarised as****mean ± standard deviation (SD)****(with range where shown); categorical variables are summarised as****number (percentage)****. ᵇ p-values for continuous/Likert variables (tech_comfort, spatial_score, interest_anat_base, pref_trad_base, ear_difficult_base) are from****Welch’s independent samples t-tests****comparing Group 1 vs Group 2. ᶜ Tech comfort item: “Comfort using smartphone/computer for learning”; 1 = very uncomfortable, 5 = very comfortable. ᵈ Cohen’s d calculated using the pooled SD (Group 1 – Group 2); values around 0.2 are considered small, 0.5 medium, 0.8 large. All values here are****small in magnitude****, indicating negligible baseline differences. ᵉ Gaming frequency categories correspond to: 1 = Never, 2 = Rarely (<1 time per week), 3 = Sometimes (1–2 times per week), 4 = Often (3–4 times per week), 5 = Very often (almost daily). ᶠ p-values for gaming_freq and prior_3d_exposure are from****χ² tests of independence****across all categories. ᵍ Prior 3D/VR anatomy exposure: self-reported use of any 3D/VR/AR anatomy application or tool. ʰ Spatial ability score based on a brief mental rotation / spatial visualisation task (0–12 correct). ⁱ Baseline attitude items used a 5-point Likert scale: 1 = strongly disagree, 5 = strongly agree. “Preference for traditional methods” refers to cadaveric/lecture-based approaches; “Perceived difficulty of ear anatomy” reflects students’ initial view before the intervention.*

**Table 3. Knowledge Outcomes in Ear Anatomy: Pre-Test, Immediate Post-Test, Retention, and Clinical Performance by Study Groupᵃ (N = 50)**

| **Outcome measure** | **Lecture only (Group 1, n=25) Mean ± SD** | **Lecture + Game (Group 2, n=25) Mean ± SD** | **Mean differenceᵇ (G2–G1) (95% CI)** | ***p*-valueᶜ** | **Cohen’s *d*ᵈ** |
| --- | --- | --- | --- | --- | --- |
| **Pre-test MCQ total (0–20)** | 10.60 ± 2.40 | 11.56 ± 2.72 | 0.96 (−0.50 to 2.42) | 0.19 | 0.37 |
| **Immediate post-test MCQ total (0–20)** | 13.20 ± 3.12 | 15.72 ± 2.73 | 2.52 (0.85 to 4.19) | 0.0039 | 0.86 |
| **Gain score (post – pre) (marks)** | 2.60 ± 1.47 | 4.16 ± 1.28 | 1.56 (0.74 to 2.38) | 0.0004 | 1.11 |
| **Retention MCQ total (0–20)** | 12.68 ± 2.33 | 14.56 ± 2.41 | 1.88 (0.54 to 3.21) | 0.0069 | 0.79 |
| **Retention gain (retention – pre) (marks)** | 2.08 ± 1.56 | 3.00 ± 1.58 | 0.92 (−0.02 to 1.86) | 0.055 | 0.58 |
| **Post-test subscores** |  |  |  |  |  |
| Basic recall subscore (0–8) | 5.64 ± 1.65 | 6.40 ± 1.38 | 0.76 (−0.11 to 1.63) | 0.085 | 0.51 |
| Spatial subscore (0–6) | 3.16 ± 1.20 | 4.16 ± 0.94 | 1.00 (0.34 to 1.66) | 0.0040 | 0.90 |
| Clinical subscore (0–6) | 3.80 ± 1.66 | 3.88 ± 1.72 | 0.08 (−0.88 to 1.04) | 0.87 | 0.05 |
| **OSPE / clinical performance (0–10)** | 6.20 ± 1.83 | 8.92 ± 1.04 | 2.72 (1.87 to 3.57) | <0.0001 | 1.83 |

*ᵃ All values are****mean ± standard deviation (SD)****. MCQ = multiple-choice question; OSPE = objective structured practical / clinical examination. ᵇ Mean difference calculated as****Group 2 (Lecture + Game) minus Group 1 (Lecture only)****; positive values favour the game group. 95% confidence intervals (CI) are based on Welch’s t-test standard error. ᶜ p-values derived from****Welch’s independent samples t-tests****comparing Group 1 and Group 2 for each outcome (two-tailed, α = 0.05). No adjustment for multiple comparisons has been applied (exploratory analysis). ᵈ Cohen’s d calculated using the pooled SD; ≈0.2 = small, ≈0.5 = medium, ≈0.8 = large effect size*

**Table 4. Self-Perceived Understanding, Confidence, Satisfaction, Cognitive Load, and Sense of Presenceᵃ (N = 50)**

**Part A – Self-perception after the session (both groups)**

| **Item (5-point Likert)** | **Lecture only (Group 1, n=25) Mean ± SD** | **Lecture + Game (Group 2, n=25) Mean ± SD** | **Mean differenceᵇ (G2–G1) (95% CI)** | ***p*-valueᶜ** | **Cohen’s *d*ᵈ** |
| --- | --- | --- | --- | --- | --- |
| **“I clearly understand the anatomy of the ear after this session.”**(post_self_understand) | 3.44 ± 0.51 | 4.20 ± 0.41 | 0.76 (0.50 to 1.02) | 5.0×10⁻⁷ | 1.65 |
| **“I feel confident answering exam questions on ear anatomy.”**(post_confidence_exam) | 3.20 ± 0.41 | 4.36 ± 0.49 | 1.16 (0.90 to 1.42) | 6.9×10⁻¹² | 2.57 |
| **Part B – Satisfaction, motivation, cognitive load, and presence (game group only)** | | | | | |

| **Item (game group only)** | **Game group (n=25) Mean ± SD** | **“Agree” or “Strongly agree”ᵉ n (%)** |
| --- | --- | --- |
| **Satisfaction & perceived usefulness** |  |  |
| “The game helped me understand the 3D anatomy of the ear better.” (sat_useful_anat) | 4.48 ± 0.51 | 25 (100.0) |
| “The game will be useful for my exam preparation in anatomy.” (sat_useful_exam) | 4.04 ± 0.68 | 20 (80.0) |
| “Overall, I am satisfied with this learning activity (the game).” (sat_overall) | 4.28 ± 0.46 | 25 (100.0) |
| “I would recommend this game to future batches of first-year MBBS students.” (sat_recommend) | 4.64 ± 0.49 | 25 (100.0) |
| **Motivation & enjoyment** |  |  |
| “I enjoyed learning anatomy using this game.” (motivation_enjoy) | 4.20 ± 0.41 | 25 (100.0) |
| “Using the game increased my interest in ear anatomy.” (motivation_interest) | 4.36 ± 0.49 | 25 (100.0) |
| **Cognitive load & sense of presence** |  |  |
| Global mental effort while using the game (1 = very low, 9 = very high) (cogload_global) | 5.28 ± 1.17 | – |
| “I felt as if I was inside the anatomical environment when using the game.” (presence_inside) | 3.92 ± 0.76 | 17 (68.0) |
| “Interacting with the structures in the game felt realistic.” (presence_realism) | 3.88 ± 0.67 | 18 (72.0) |
| “I was fully focused and immersed while playing the game.” (presence_focus) | 4.36 ± 0.76 | 21 (84.0) |

*ᵃ All Likert items used a 5-point scale: 1 = strongly disagree, 2 = disagree, 3 = neutral, 4 = agree, 5 = strongly agree; higher scores indicate more positive responses. ᵇ Mean difference calculated as****Group 2 (Lecture + Game) minus Group 1 (Lecture only)****; positive values favour the game group. 95% confidence intervals (CI) are based on Welch’s t-test standard error. ᶜ p-values for Part A are from****Welch’s independent samples t-tests****comparing self-perception between groups (two-tailed, α = 0.05). ᵈ Cohen’s d calculated using pooled SD; ≈0.2 = small, ≈0.5 = medium, ≈0.8 = large effect size. Here, values >1.5 represent****very large****group differences. ᵉ “Agree/Strongly agree” defined as a response of****4 or 5****on the 5-point scale; values shown as number (percentage) within the intervention group. Cognitive load (cogload_global) is summarised as a separate 1–9 rating and is not dichotomised.*

**Table 5. Game Usage Patterns, Technical Issues, and Discomfort Among Intervention Groupᵃ (n = 25)**

| **Panel A – Game exposure and usage (continuous measures)** | | | | |
| --- | --- | --- | --- | --- |
| **Measure** | **Mean ± SD** | | **Median (IQR)** | **Range (min–max)** |
| **Supervised game use (minutes)** (game_use_supervised)¹ | 32.8 ± 4.7 | | 32 (30–36) | 24–44 |
| Levels attempted (game_levels_attempted) | 5.0 ± 1.0 | | 5 (4–6) | 3–7 |
| Levels completed (game_levels_completed) | 4.2 ± 1.1 | | 4 (3–5) | 2–6 |
| In-game questions answered (game_qns_answered) | 21.4 ± 4.7 | | 21 (18–24) | 12–30 |
| In-game questions correct (game_qns_correct) | 15.9 ± 4.2 | | 16 (13–19) | 9–24 |
| **Extra home/hostel use (minutes)**² (game_home_use_min) | 42.2 ± 19.5 | | 40 (30–60) | 20–90 |
| Time to install/setup game (minutes) (install_time_min) | 8.4 ± 2.2 | | 8 (7–10) | 5–12 |
| Faculty-rated feasibility of running session (1–5) (session_feasible) | 4.4 ± 0.5 | | 4 (4–5) | 4–5 |
| **Panel B – Device type, home use, and technical feasibility (categorical patterns)** | | | | |
| **Measure** | | **Category** | | **n (%) (n = 25)** |
| **Primary device used for game** (game_device_type) | | Android smartphone | | 18 (72.0) |
|  | | iPhone | | 3 (12.0) |
|  | | Tablet | | 2 (8.0) |
|  | | Laptop/PC | | 2 (8.0) |
|  | | Other | | 0 (0.0) |
| **Extra home/hostel use of game** (game_home_use) | | No | | 7 (28.0) |
|  | | Yes | | 18 (72.0) |
| **Any technical issues encountered** (game_tech_issues) | | No | | 19 (76.0) |
|  | | Yes | | 6 (24.0) |
| **Type of technical issue among those with issues**³ (game_tech_issue_type) | | Installation problem | | 1 (16.7) |
|  | | App crash | | 2 (33.3) |
|  | | Slow/lagging performance | | 2 (33.3) |
|  | | Difficulty with controls | | 1 (16.7) |
|  | | Other | | 0 (0.0) |
| **Staff help required for installation/use** (staff_help_needed) | | No | | 18 (72.0) |
|  | | Yes | | 7 (28.0) |
| **Panel C – Discomfort and side-effects during game use** | | | | |
| **Measure** | | | **Category** | **n (%) (n = 25)** |
| **Any discomfort (eye strain/headache/nausea)** (discomfort_any) | | | No | 20 (80.0) |
|  | | | Yes | 5 (20.0) |
| **Eye strain** (discomfort_eye) | | | None | 20 (80.0) |
|  | | | Mild | 4 (16.0) |
|  | | | Moderate | 1 (4.0) |
|  | | | Severe | 0 (0.0) |
| **Headache** (discomfort_headache) | | | None | 21 (84.0) |
|  | | | Mild | 3 (12.0) |
|  | | | Moderate | 1 (4.0) |
|  | | | Severe | 0 (0.0) |
| **Nausea / dizziness** (discomfort_nausea) | | | None | 23 (92.0) |
|  | | | Mild | 2 (8.0) |
|  | | | Moderate | 0 (0.0) |
|  | | | Severe | 0 (0.0) |

*ᵃ All values in this table are restricted to the****intervention group****(Lecture + Game, n = 25). Continuous variables are summarised as****mean ± standard deviation (SD)****, median (interquartile range [IQR]) and range; categorical variables are summarised as****number (percentage)****. No between-group inferential testing is applicable here because only the game group is included. ¹ Supervised game use refers to the time spent with the virtual simulation game during the scheduled, faculty-supervised session in the skills lab or classroom.*

*² Extra home/hostel use in Panel A is summarised****only among students who reported any home use****(n = 18). Students who did not use the game outside the supervised session (n = 7) are captured separately in Panel B. ³ Percentages for type of technical issue are calculated among those who reported any issue (n = 6), not out of the full sample (n = 25).*

**Figure 6 Relationships Between Spatial Ability, Game Exposure, Learning Gains, and Student Feedback**

| **Panel A – Pearson correlations between spatial ability, exposure, and learning gainsᵇ**  Values are **correlation coefficient *r*** (two-tailed *p*-value). | | | | | | | |
| --- | --- | --- | --- | --- | --- | --- | --- |
|  | **1. Spatial ability** | | **2. Supervised time** | **3. Home-use minutes** | **4. Post-test gain** | **5. Retention gain** | **6. Post-test spatial subscore** |
| **1. Spatial ability (0–12)** | 1.00 (–) | | −0.31 (p = 0.13) | −0.09 (p = 0.67) | 0.05 (p = 0.82) | −0.03 (p = 0.87) | 0.05 (p = 0.81) |
| **2. Supervised time (min)** | −0.31 (p = 0.13) | | 1.00 (–) | 0.31 (p = 0.13) | −0.14 (p = 0.50) | −0.02 (p = 0.93) | 0.25 (p = 0.22) |
| **3. Home-use minutes** | −0.09 (p = 0.67) | | 0.31 (p = 0.13) | 1.00 (–) | 0.22 (p = 0.29) | 0.08 (p = 0.69) | 0.34 (p = 0.10) |
| **4. Post-test gain (marks)** | 0.05 (p = 0.82) | | −0.14 (p = 0.50) | 0.22 (p = 0.29) | 1.00 (–) | 0.87 (p < 0.001) | 0.18 (p = 0.39) |
| **5. Retention gain (marks)** | −0.03 (p = 0.87) | | −0.02 (p = 0.93) | 0.08 (p = 0.69) | 0.87 (p < 0.001) | 1.00 (–) | 0.22 (p = 0.29) |
| **6. Post-test spatial subscore** | 0.05 (p = 0.81) | | 0.25 (p = 0.22) | 0.34 (p = 0.10) | 0.18 (p = 0.39) | 0.22 (p = 0.29) | 1.00 (–) |
| **Panel B – Thematic summary of student comments on the virtual simulation gameᶜ** | | | | | | | |
| **Theme** | | **Illustrative student commentsᵈ** | | | | | |
| **1. Enhanced 3D understanding and spatial grasp** | | “*3D view of middle and inner ear was very clear.*” (ID 26, female) • “*Helped me understand ossicles orientation.*” (ID 27, female) | | | | | |
| **2. Engagement and exam-oriented practice** | | “*Level-based questions kept me engaged.*” (ID 34, female) • “*Good revision before internal exam.*” (ID 32, male) | | | | | |
| **3. Interface and performance issues** | | “*Controls were a bit sensitive on phone.*” (ID 26, female) • “*Sometimes app lagged when zooming.*” (ID 31, female) | | | | | |
| **4. Requests for added features/clinical integration** | | “*Add more clinical case questions.*” (ID 40, male) • “*Include Hindi label option for some structures.*” (ID 30, male) • “*Increase zoom and rotation smoothness.*” (ID 26, female) • “*Add short summary notes after each level.*” (ID 28, male) | | | | | |

*ᵃ Analysis restricted to the****intervention (Lecture + Game) group****(n = 25).
ᵇ Pearson correlation coefficients (*r*) were calculated between baseline spatial ability (spatial_score), supervised game time (game_use_supervised), extra home-use minutes (game_home_use_min), pre–post gain (gain_post), retention gain (gain_ret), and post-test spatial MCQ subscore (post_mcq_spatial). Two-tailed*p*-values are reported;*p*< 0.05 was considered statistically significant.ᶜ Qualitative themes were generated by grouping short free-text responses from fb_like_most, fb_dislike, and fb_suggestions into conceptually related clusters (e.g., 3D understanding, exam focus, usability issues, requested enhancements).
ᵈ Student identifiers (ID) and gender are shown in brackets to illustrate diversity of responses; content has been reproduced verbatim from the simulated dataset.*
