# Supplementary material for: Demystifying Ear Anatomy Through a 3D Virtual Simulation Game: An Exploratory Study Among First-Year MBBS Students
Source: Research Square preprint supplement (doi:10.21203/rs.3.rs-8387254/v1), 2026-01-08
Supplement: Supplementary file 2 [file ac44563bf9189a5312581d72.docx]

Figure 1. Study Flow Diagram


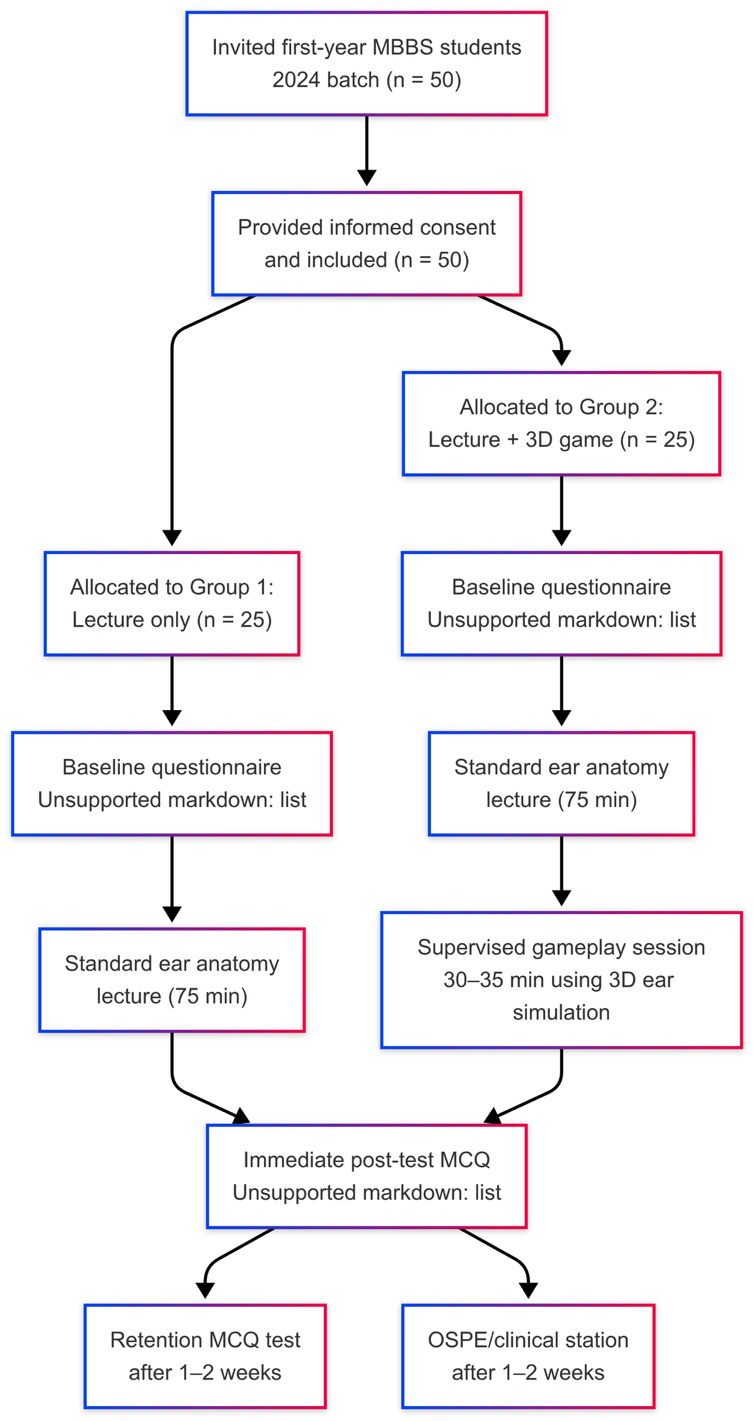


**Figure:** Flowchart illustrating the study design involving first-year MBBS students (2024 batch, n = 50). Participants were randomized into two groups: Group 1 received a lecture only, while Group 2 received the lecture followed by a supervised 3D ear simulation game. Assessments included baseline tests, immediate post-tests, and follow-up evaluations (MCQ and OSPE) after 1–2 weeks.

**Figure 2. Correlation Matrix of Spatial Ability, Game Exposure, and Learning Gains (Intervention Group, n = 25)**

**
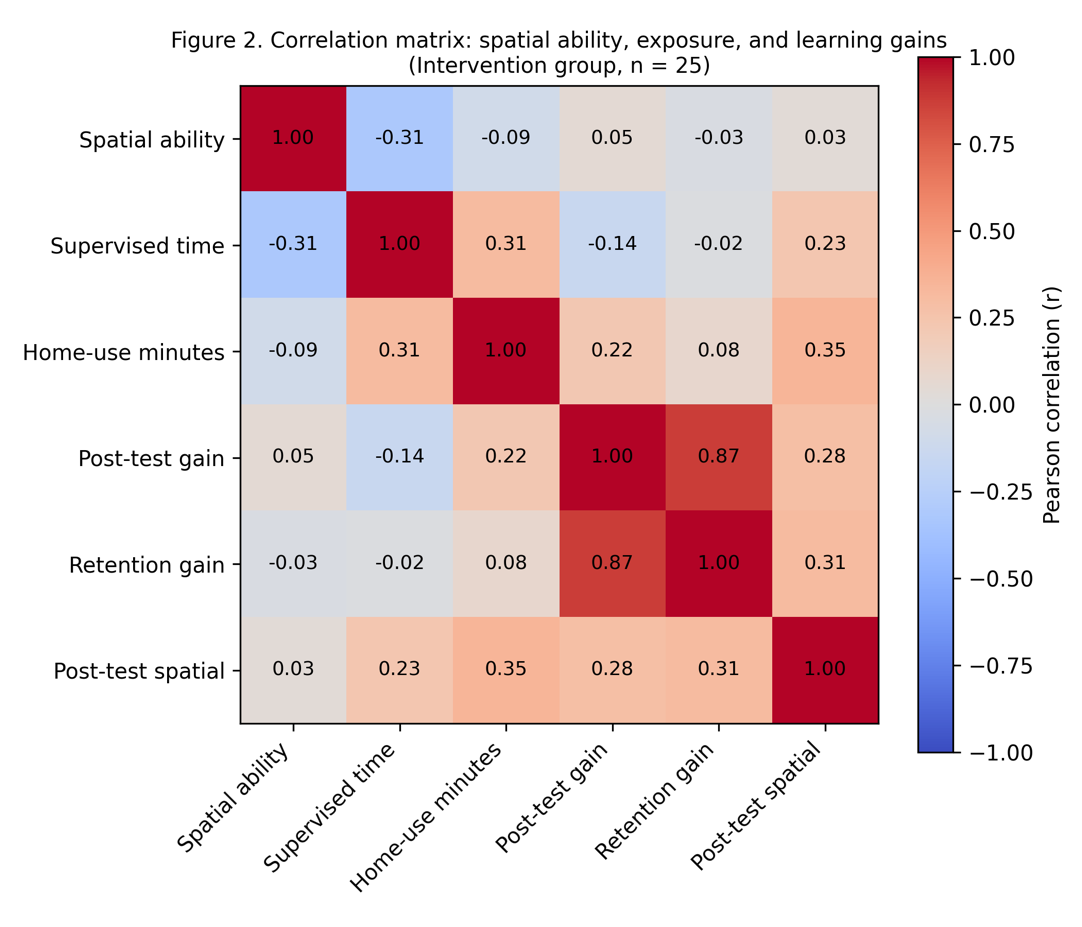
**

**Figure 2.** Pearson correlation matrix among spatial ability, supervised game time, extra home-use minutes, pre–post gain, retention gain, and post-test spatial MCQ subscore in the intervention group (n = 25). Cell values show correlation coefficients (*r*). Darker cells indicate stronger positive (upper right) or negative (lower left) relationships.
